# Supplementary material for: Blastocystis subtype distribution in domestic and captive wild bird species from Brazil using next generation amplicon sequencing
Source: PubMed Central journal article supplement — Parasite Epidemiol Control. 2020 Jan 14;9:e00138. doi: 10.1016/j.parepi.2020.e00138 (PMC6995250; doi:10.1016/j.parepi.2020.e00138), 2020-01-14
Supplement: mmc1.pdf [file mmc1.pdf]

**Supplementary Table 1.** Reference sequences for each *Blastocystis* subtype included in the alignment used to conduct phylogenetic analysis with their GenBank accession number, host, and location.

| <b>Subtype</b> | <b>GenBank<br/>Accession<br/>Number</b> | <b>Host</b> | <b>Location</b> |
|----------------|-----------------------------------------|-------------|-----------------|
| ST-1           | U51151                                  | Human       | USA             |
|                | HQ641595                                | Human       | Colombia        |
|                | AB070989                                | Human       | Japan           |
| ST-2           | AB070997                                | Primate     | Japan           |
|                | HQ641605                                | Human       | Colombia        |
|                | AB070987                                | Human       | Japan           |
| ST-3           | AB091234                                | Human       | Japan           |
|                | HQ641613                                | Human       | Colombia        |
|                | AB107963                                | Pig         | Japan           |
| ST-4           | HQ641621                                | Human       | USA             |
|                | AY244620                                | Human       | Germany         |
|                | EU679347                                | Human       | USA             |
| ST-5           | AB070998                                | Pig         | Japan           |
|                | KF410597                                | Pig         | USA             |
|                | AB107966                                | Cattle      | Japan           |
| ST-6           | AY135411                                | Turkey      | France          |
|                | HQ641658                                | Chicken     | Spain           |
|                | AB107972                                | Partridge   | Japan           |
|                | AB070990                                | Human       | Japan           |
| ST-7           | AY590109                                | Human       | France          |
|                | AF408427                                | Human       | Singapore       |
|                | HQ641661                                | Chicken     | Spain           |
|                | HQ641660                                | Chicken     | Spain           |
|                | AY135409                                | Chicken     | France          |
|                | AY135410                                | Chicken     | France          |
|                | KX523972                                | Human       | Brazil          |
|                | MG720557                                | Chicken     | India           |
|                | AY135412                                | Duck        | France          |
|                | AB070991                                | Human       | Japan           |
|                | AY590107                                | Human       | Singapore       |
|                | AB091245                                | Quail       | Japan           |
|                | KF447157                                | Human       | Singapore       |
|                | AB070996                                | Quail       | Japan           |
| ST-8           | AB107971                                | Pheasant    | Japan           |
|                | AB107970                                | Primate     | Japan           |
| ST-9           | AF408425                                | Human       | Japan           |
|                | KC138681                                | Human       | Denmark         |
|                | AF408426                                | Human       | Japan           |

| <b>Subtype</b> | <b>GenBank<br/>Accession<br/>Number</b> | <b>Host</b> | <b>Location</b> |
|----------------|-----------------------------------------|-------------|-----------------|
| ST-10          | HQ641629                                | Cattle      | USA             |
|                | MH634455                                | Cattle      | USA             |
|                | KC148207                                | Camel       | Libya           |
| ST-11          | GU256900                                | Elephant    | Australia       |
|                | GU256901                                | Elephant    | Australia       |
|                | MK244926                                | Cattle      | USA             |
| ST-12          | GU256936                                | Kangaroo    | Australia       |
|                | GU256902                                | Giraffe     | Australia       |
|                | GU256905                                | Giraffe     | Australia       |
| ST-13          | GU256934                                | Quokka      | Australia       |
|                | GU256935                                | Quokka      | Australia       |
|                | KC148209                                | Mouse deer  | UK              |
| ST-14          | MK634456                                | Cattle      | USA             |
|                | KC148205                                | Cattle      | Libya           |
|                | JQ996370                                | Cattle      | USA             |
| ST-15          | KC148210                                | Camel       | Libya           |
|                | KC148211                                | Gibbon      | not available   |
| ST-16          | EU427512                                | kangaroo    | Japan           |
|                | EU427514                                | kangaroo    | Japan           |
| ST-17          | KC148208                                | Gundi       | Libya           |
|                | MK244933                                | Cattle      | USA             |
|                | MH634459                                | Cattle      | USA             |
| ST-21          | MK244935                                | Cattle      | USA             |
| ST-23          | MK244936                                | Cattle      | USA             |
|                | MH634464                                | Cattle      | USA             |
|                | MH634463                                | Cattle      | USA             |
| ST-24          | MK244942                                | Cattle      | USA             |
|                | MH634468                                | Cattle      | USA             |
|                | MH634469                                | Cattle      | USA             |
| ST-25          | MK244944                                | Cattle      | USA             |
|                | MH634470                                | Cattle      | USA             |
|                | MK244943                                | Cattle      | USA             |
| ST-26          | MK244953                                | Cattle      | USA             |
|                | MH634474                                | Cattle      | USA             |
|                | MK244951                                | Cattle      | USA             |
