# Supplementary material for: Blastocystis subtype distribution in domestic and captive wild bird species from Brazil using next generation amplicon sequencing
Source: PubMed Central journal article supplement — Parasite Epidemiol Control. 2020 Jan 14;9:e00138. doi: 10.1016/j.parepi.2020.e00138 (PMC6995250; doi:10.1016/j.parepi.2020.e00138), 2020-01-14
Supplement: mmc2.pdf [file mmc2.pdf]

**Supplementary Table 2.** List of *Blastocystis* nucleotide sequences submitted to Genbank including for each information on subtype, host, and isolate identification name.

| GenBank Accession Number | Subtype | Host                                | Isolate  |
|--------------------------|---------|-------------------------------------|----------|
| MN472766                 | ST27    | <i>Pavo cristatus</i>               | 36 ST27  |
| MN472767                 | ST27    | <i>Anas querquedula</i>             | 38 ST27  |
| MN472768                 | ST5     | <i>Struthio camelus</i>             | 33 ST5   |
| MN472769                 | ST6     | <i>Phasianus colchicus</i>          | 63a ST6  |
| MN472770                 | ST7     | <i>Anas querquedula</i>             | 38a ST7  |
| MN472771                 | ST7     | <i>Phasianus colchicus</i>          | 158a ST7 |
| MN472772                 | ST7     | <i>Coturnix coturnix</i>            | 208a ST7 |
| MN472773                 | ST7     | <i>Numida meleagris</i>             | 102a ST7 |
| MN472774                 | ST24    | <i>Struthio camelus</i>             | 32 ST24  |
| MN472775                 | ST6     | <i>Phasianus colchicus</i>          | 133 ST6  |
| MN472776                 | ST7     | <i>Numida meleagris</i>             | 103a ST7 |
| MN472777                 | ST7     | <i>Phasianus colchicus</i>          | 133a ST7 |
| MN472778                 | ST7     | <i>Numida meleagris</i>             | 102b ST7 |
| MN472779                 | ST7     | <i>Anser cygnoides</i>              | 98a ST7  |
| MN472780                 | ST28    | <i>Anas querquedula</i>             | 38 ST28  |
| MN472781                 | ST28    | <i>Pavo cristatus</i>               | 132 ST28 |
| MN472782                 | ST10    | <i>Struthio camelus</i>             | 32a ST10 |
| MN472783                 | ST7     | <i>Cairina moschata momelanotus</i> | 105a ST7 |
| MN472784                 | ST7     | <i>Phasianus colchicus</i>          | 133b ST7 |
| MN472785                 | ST7     | <i>Anas platyrhynchos</i>           | 101a ST7 |
| MN472786                 | ST6     | <i>Numida meleagris</i>             | 103a ST6 |
| MN472787                 | ST6     | <i>Phasianus colchicus</i>          | 135 ST6  |
| MN472788                 | ST7     | <i>Phasianus colchicus</i>          | 133c ST7 |
| MN472789                 | ST7     | <i>Anser cygnoides</i>              | 98b ST7  |
| MN472790                 | ST7     | <i>Numida meleagris</i>             | 103b ST7 |
| MN472791                 | ST7     | <i>Phasianus colchicus</i>          | 133d ST7 |
| MN472792                 | ST5     | <i>Struthio camelus</i>             | 32 ST5   |
| MN472793                 | ST7     | <i>Anser cygnoides</i>              | 98c ST7  |
| MN472794                 | ST7     | <i>Anser cygnoides</i>              | 98d ST7  |
| MN472795                 | ST10    | <i>Struthio camelus</i>             | 32b ST10 |
| MN472796                 | ST10    | <i>Anas querquedula</i>             | 38 ST10  |
| MN472797                 | ST7     | <i>Anas querquedula</i>             | 38b ST7  |
| MN472798                 | ST7     | <i>Cairina moschata momelanotus</i> | 105b ST7 |
| MN472799                 | ST14    | <i>Cairina moschata momelanotus</i> | 105 ST14 |
| MN472800                 | ST7     | <i>Phasianus colchicus</i>          | 158b ST7 |
| MN472801                 | ST7     | <i>Coturnix coturnix</i>            | 208b ST7 |
| MN472802                 | ST7     | <i>Anas querquedula</i>             | 38c ST7  |
| MN472803                 | ST7     | <i>Anser cygnoides</i>              | 98e ST7  |
| MN472804                 | ST7     | <i>Numida meleagris</i>             | 102c ST7 |
| MN472805                 | ST7     | <i>Numida meleagris</i>             | 103c ST7 |
| MN472806                 | ST7     | <i>Phasianus colchicus</i>          | 133e ST7 |
| MN472807                 | ST7     | <i>Numida meleagris</i>             | 102d ST7 |

| GenBank Accession Number | Subtype | Host                        | Isolate  |
|--------------------------|---------|-----------------------------|----------|
| MN472808                 | ST7     | <i>Anas platyrhynchos</i>   | 101b ST7 |
| MN472809                 | ST7     | <i>Coturnix coturnix</i>    | 208c ST7 |
| MN472810                 | ST6     | <i>Numida meleagris</i>     | 103b ST6 |
| MN472811                 | ST6     | <i>Coturnix coturnix</i>    | 208 ST6  |
| MN472812                 | ST7     | <i>Numida meleagris</i>     | 103d ST7 |
| MN472813                 | ST7     | <i>Anas querquedula</i>     | 38d ST7  |
| MN472814                 | ST7     | <i>Anser cygnoides</i>      | 98f ST7  |
| MN472815                 | ST7     | <i>Numida meleagris</i>     | 103e ST7 |
| MN472816                 | ST7     | <i>Coturnix coturnix</i>    | 208d ST7 |
| MN472817                 | ST7     | <i>Anas querquedula</i>     | 38e ST7  |
| MN472818                 | ST7     | <i>Phasianus colchicus</i>  | 135a ST7 |
| MN472819                 | ST14    | <i>Agapornis nigrigenis</i> | 174 ST14 |
| MN472820                 | ST7     | <i>Anas querquedula</i>     | 38f ST7  |
| MN472821                 | ST7     | <i>Anser cygnoides</i>      | 98g ST7  |
| MN472822                 | ST7     | <i>Anas platyrhynchos</i>   | 101c ST7 |
| MN472823                 | ST7     | <i>Anas platyrhynchos</i>   | 101d ST7 |
| MN472824                 | ST7     | <i>Coturnix coturnix</i>    | 208e ST7 |
| MN472825                 | ST7     | <i>Coturnix coturnix</i>    | 208f ST7 |
| MN472826                 | ST6     | <i>Phasianus colchicus</i>  | 63b ST6  |
| MN472827                 | ST7     | <i>Phasianus colchicus</i>  | 135b ST7 |
| MN472828                 | ST7     | <i>Anas platyrhynchos</i>   | 101e ST7 |
| MN472829                 | ST6     | <i>Numida meleagris</i>     | 102 ST6  |
| MN472830                 | ST7     | <i>Phasianus colchicus</i>  | 133f ST7 |
| MN472831                 | ST7     | <i>Anas platyrhynchos</i>   | 101f ST7 |
| MN472832                 | ST7     | <i>Numida meleagris</i>     | 103f ST7 |
| MN472833                 | ST10    | <i>Struthio camelus</i>     | 32c ST10 |
| MN472834                 | ST7     | <i>Numida meleagris</i>     | 103g ST7 |
| MN472835                 | ST7     | <i>Coturnix coturnix</i>    | 208g ST7 |
| MN472836                 | ST7     | <i>Coturnix coturnix</i>    | 208h ST7 |
| MN472837                 | ST7     | <i>Anser cygnoides</i>      | 98h ST7  |
| MN472838                 | ST7     | <i>Coturnix coturnix</i>    | 208i ST7 |
